# Supplementary material
Source: Springer Nature journal article supplement (https://www.springermedizin.de/resource/supplementary/12889_2007_1143_MOESM3_ESM.pdf/9502548)
Supplement: MOESM3 [file 9502548]

**Table 2 Interviews conducted as part of the process evaluation**

| Staff category          | Organisation/<br>Setting | Phase of programme* |          |                | Total     |
|-------------------------|--------------------------|---------------------|----------|----------------|-----------|
|                         |                          | Mapping             | Planning | Implementation |           |
| Project co-ordinator(s) |                          | -                   | -        | 8              | 8         |
| Intervention team**     | Health Board             | 5                   | 5        | 10             | 20        |
|                         | URP                      | 1                   | 1        | 4              | 6         |
|                         | HA                       | 1                   | 1        | 2              | 4         |
| Subgroup members        | Community                | -                   | -        | 2              | 2         |
|                         | Primary Care             | -                   | -        | 5              | 5         |
|                         | Young People             | -                   | -        | 6              | 6         |
|                         | Workplace                | -                   | -        | -              | -         |
| Management              | Health Board             | 1                   | 1        | 3              | 5         |
|                         | URP                      | -                   | -        | 1              | 1         |
|                         | HA                       | -                   | -        | 2              | 2         |
| <b>Totals</b>           |                          | <b>8</b>            | <b>8</b> | <b>43</b>      | <b>59</b> |

**\*Definiton of the programme phases**

**Mapping:** Activity undertaken as part of the needs assessment/audit. Aimed at gathering the views of key community members to assess smoking related activity and attitudes. As well as the engagement of key community participants.

**Planning:** Activity related to setting, revisiting and reshaping project objectives. Agreeing responsibility and leadership for specific objectives/projects and summarising/tracking current progress in order to facilitate reshaping of objectives. (Overall and subgroup level)

**Implementation:** Activities directly related to carrying out or facilitating specific project objectives. 'Actual doing'. Including activity related to securing appropriate funding and resources to allow specific initiatives to progress and involvement of community members or workers in order to progress the objective (undertake particular activities).

**\*\*Key intervention team members were interviewed three times during the implementation Phase of the programme.**
